# Supplementary material for: Individual-specific changes in the human gut microbiota after challenge with enterotoxigenic Escherichia coli and subsequent ciprofloxacin treatment
Source: PubMed Central journal article supplement (PMC4898365; doi:10.1186/s12864-016-2777-0), 2016-06-08
Supplement: 12864_2016_2777_MOESM6_ESM.pdf [file 12864_2016_2777_MOESM6_ESM.pdf]

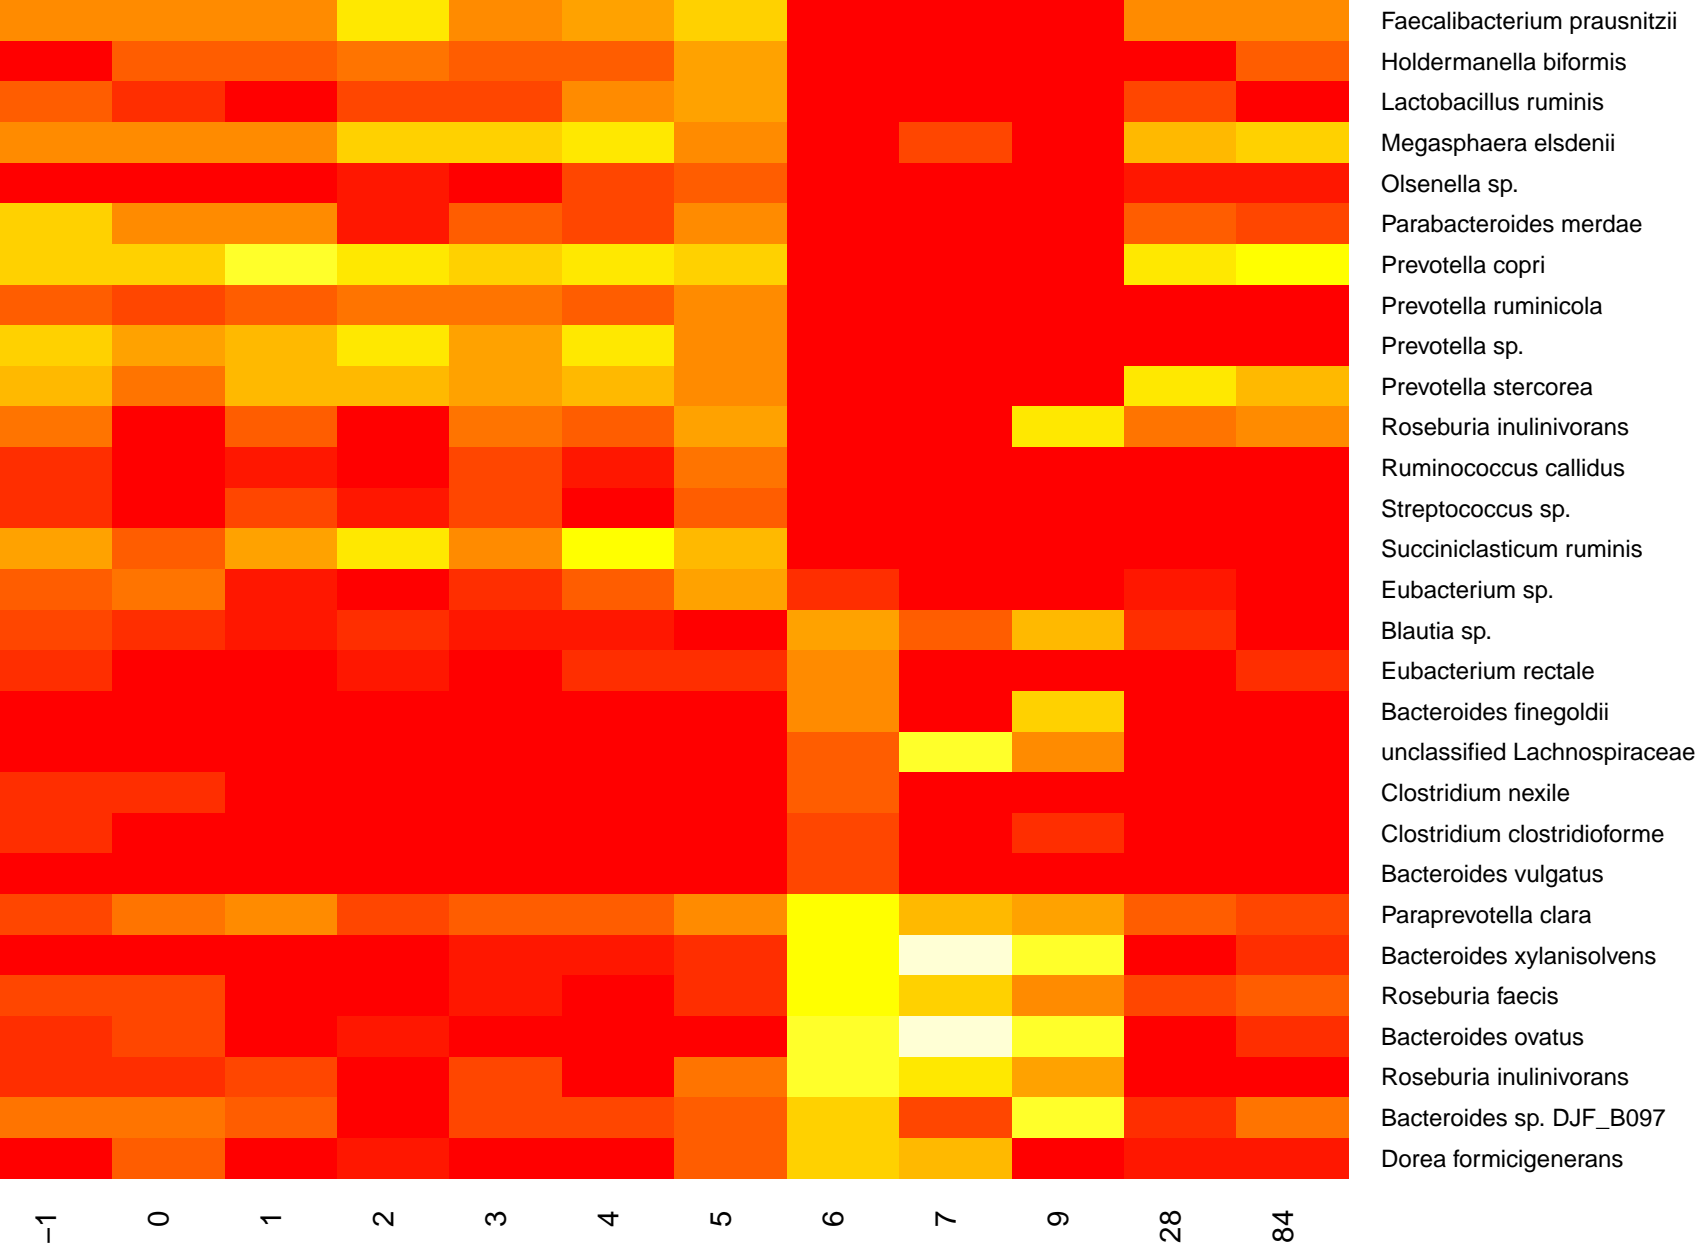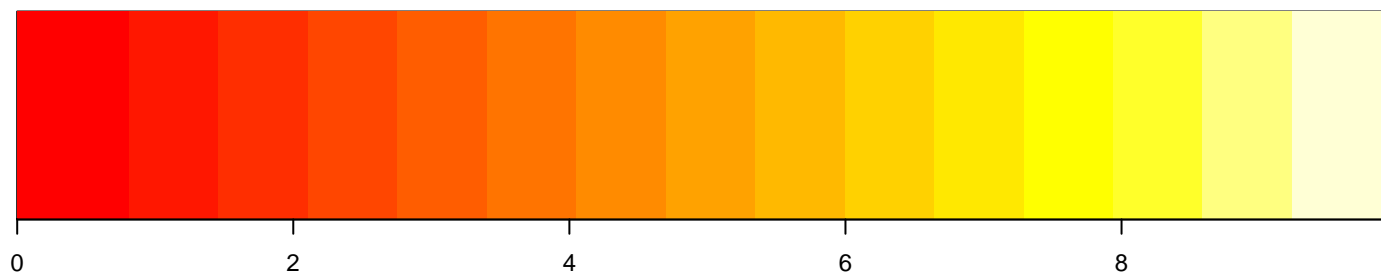

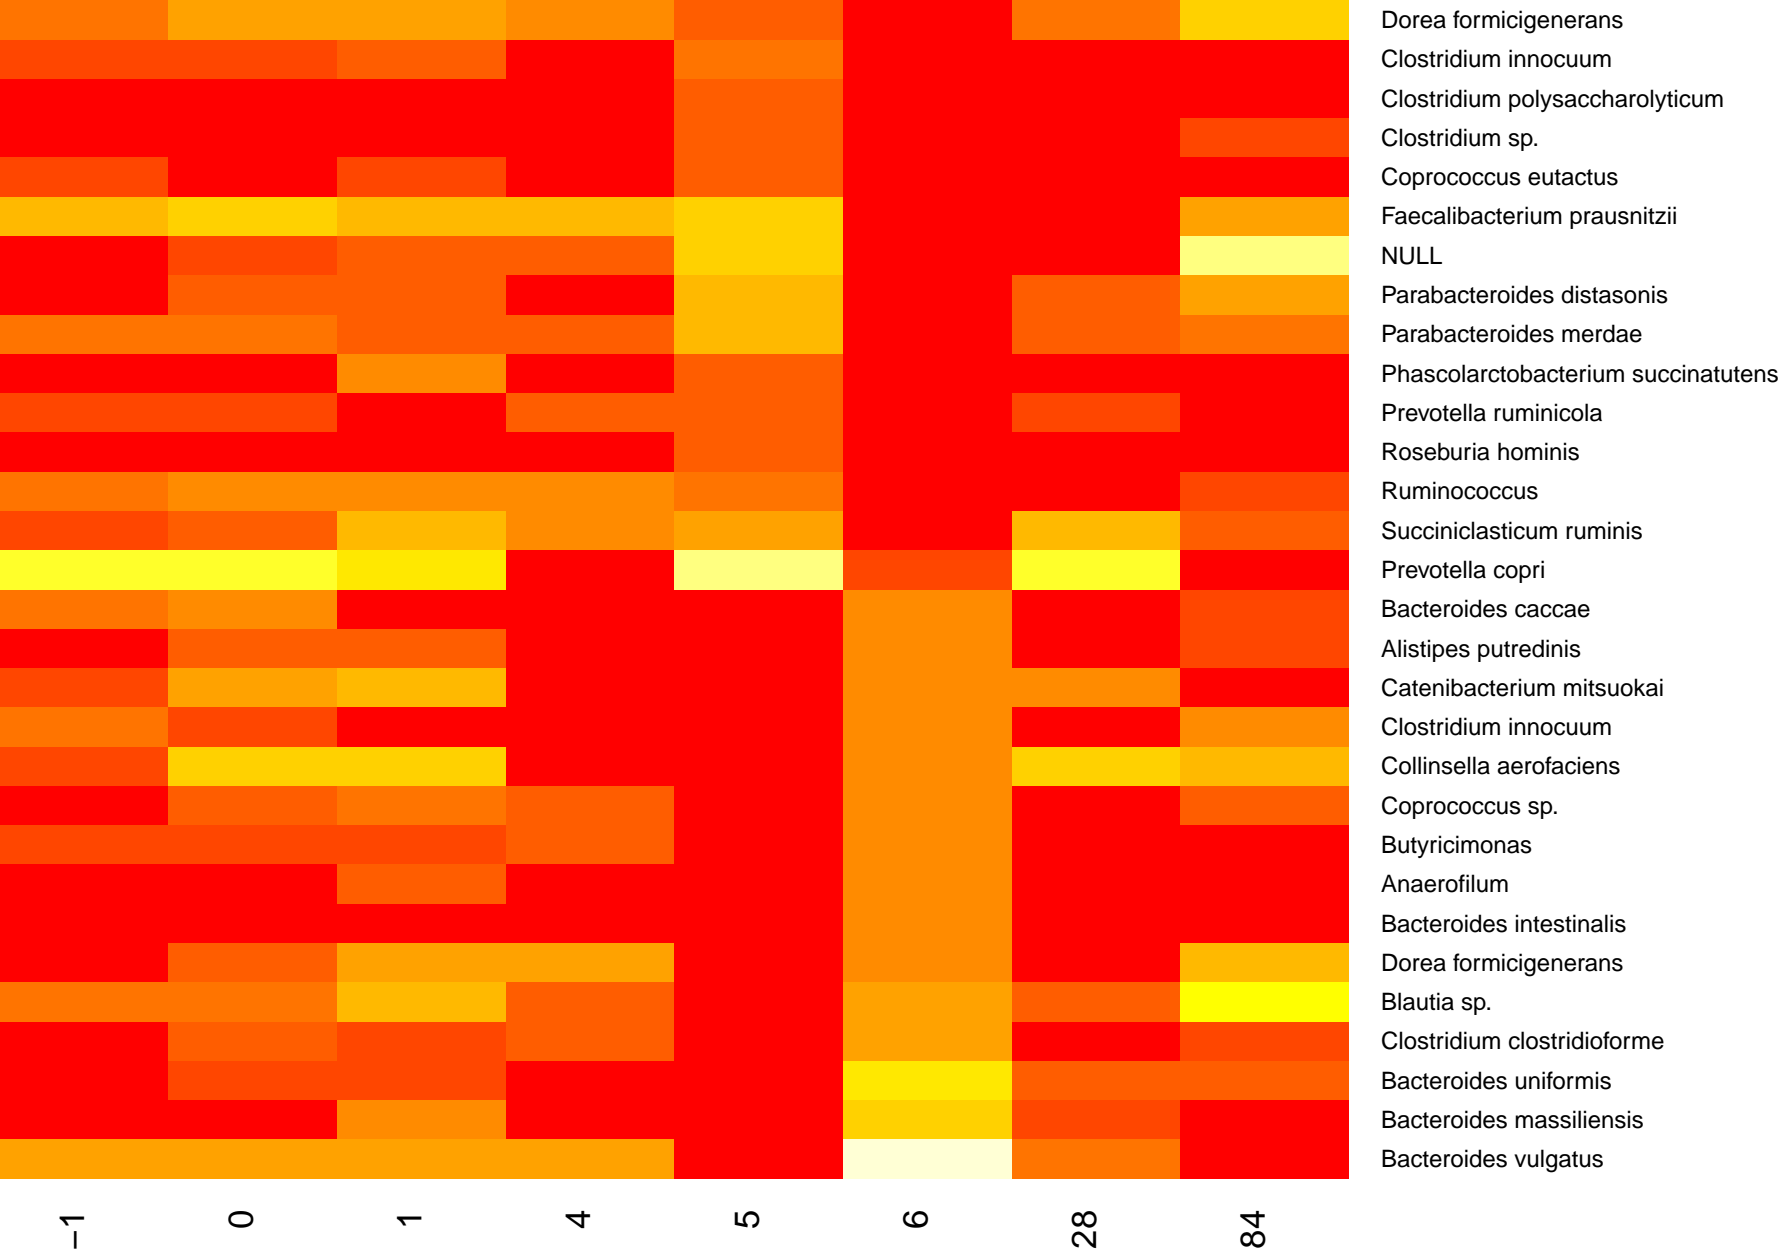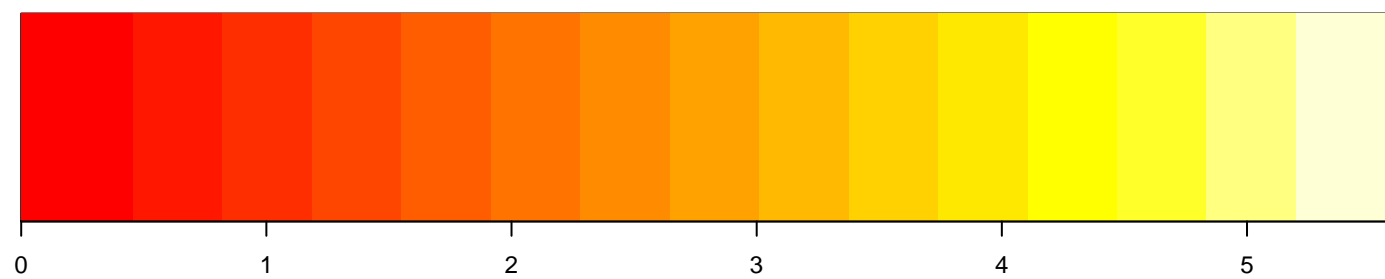

**P13**

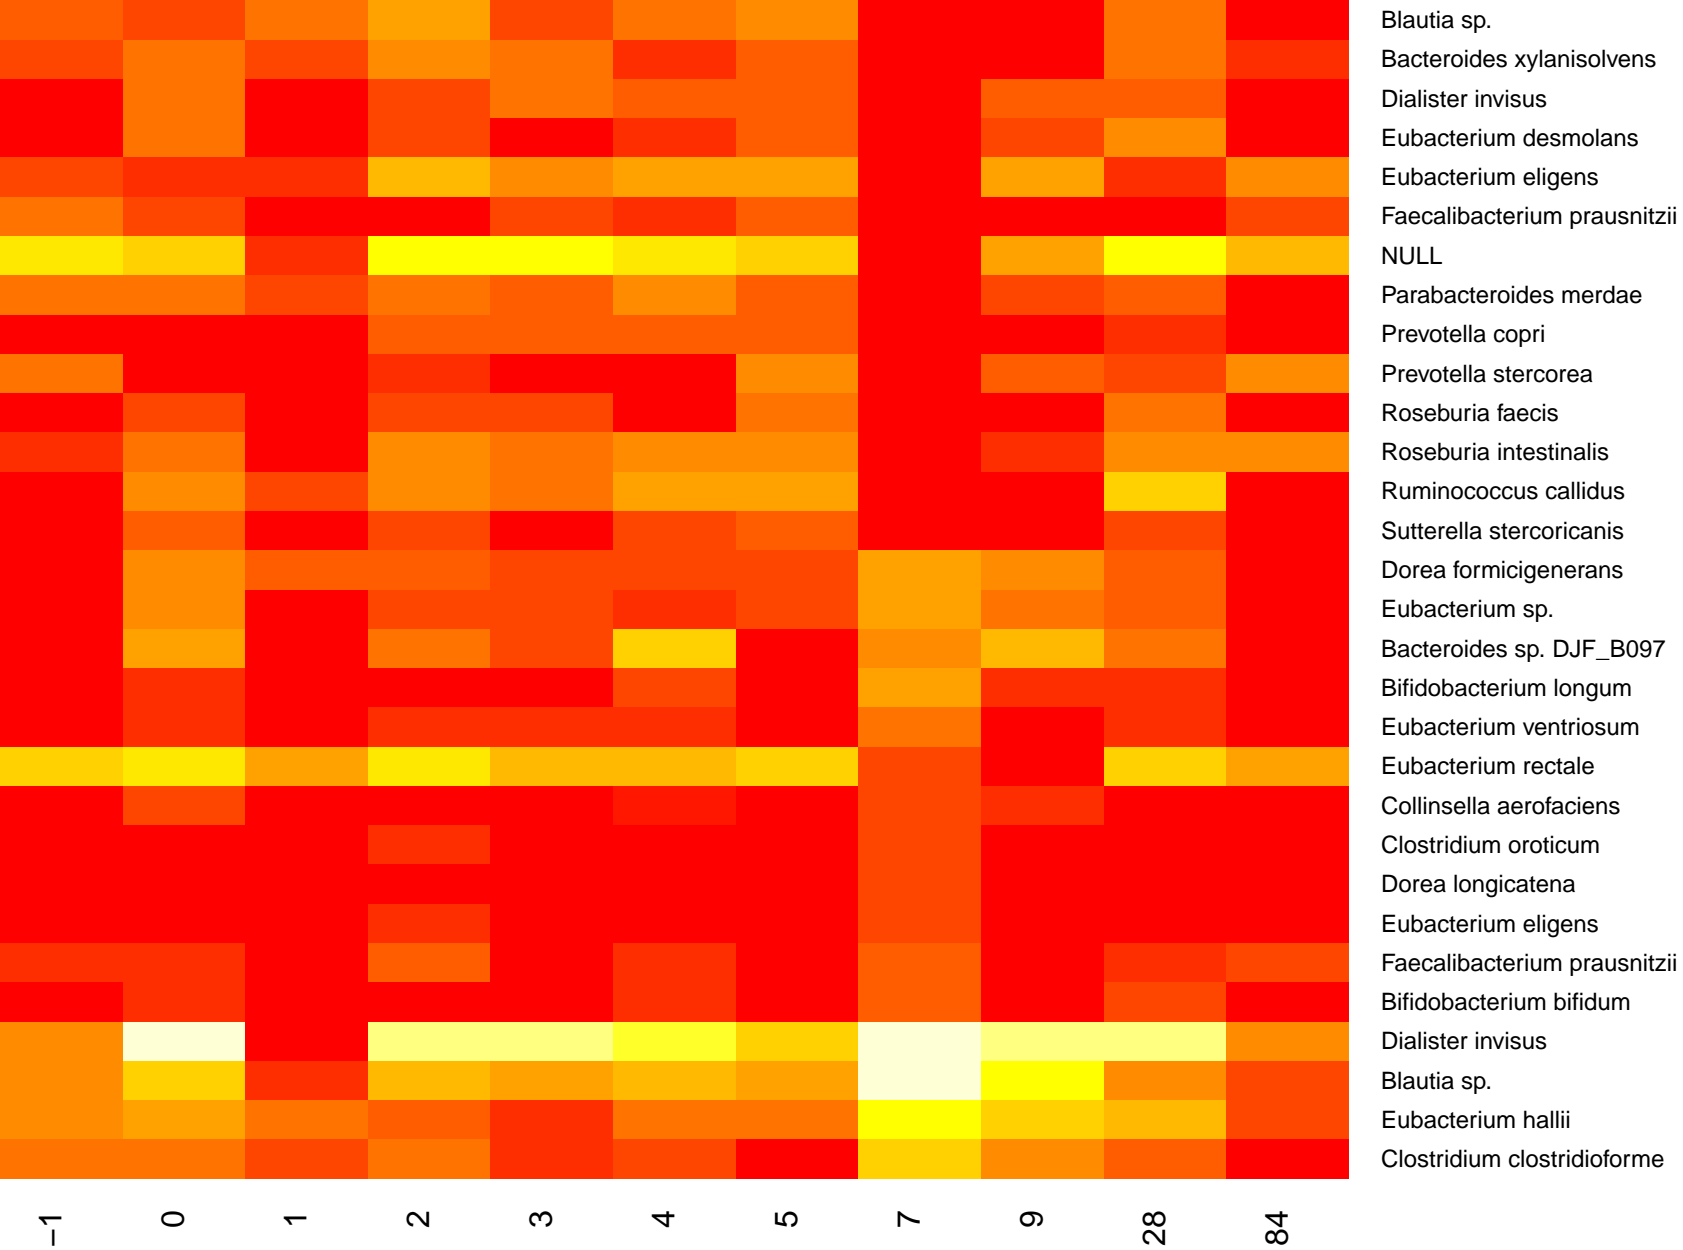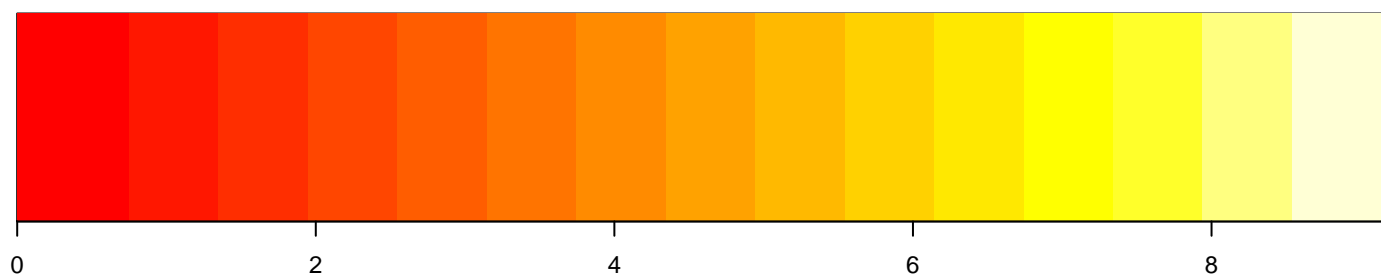

**P22**

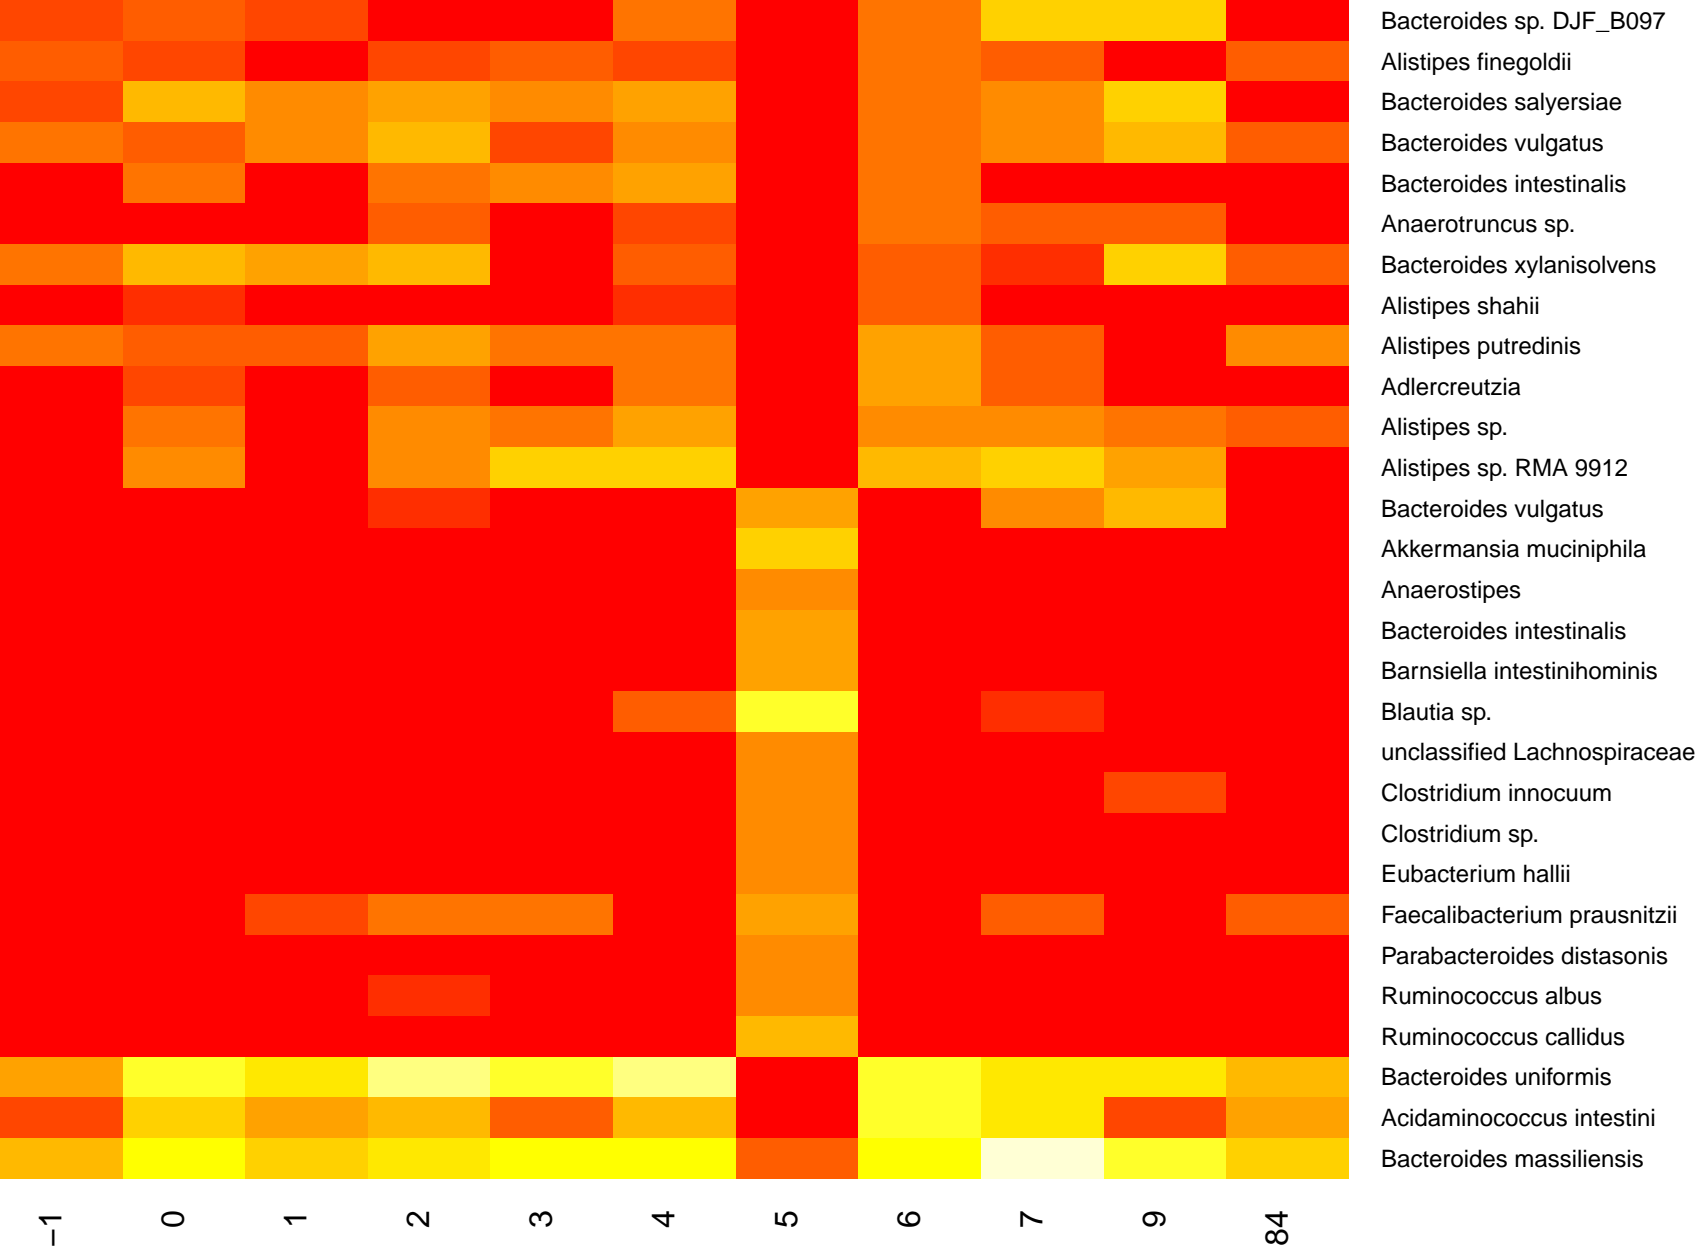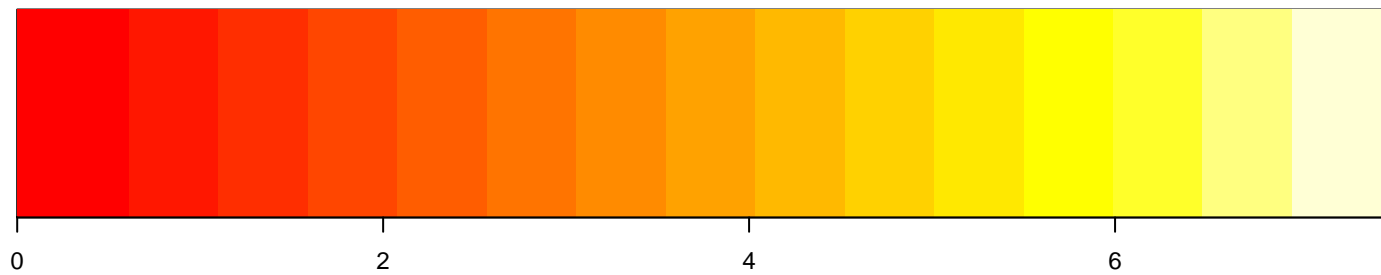

**P29**

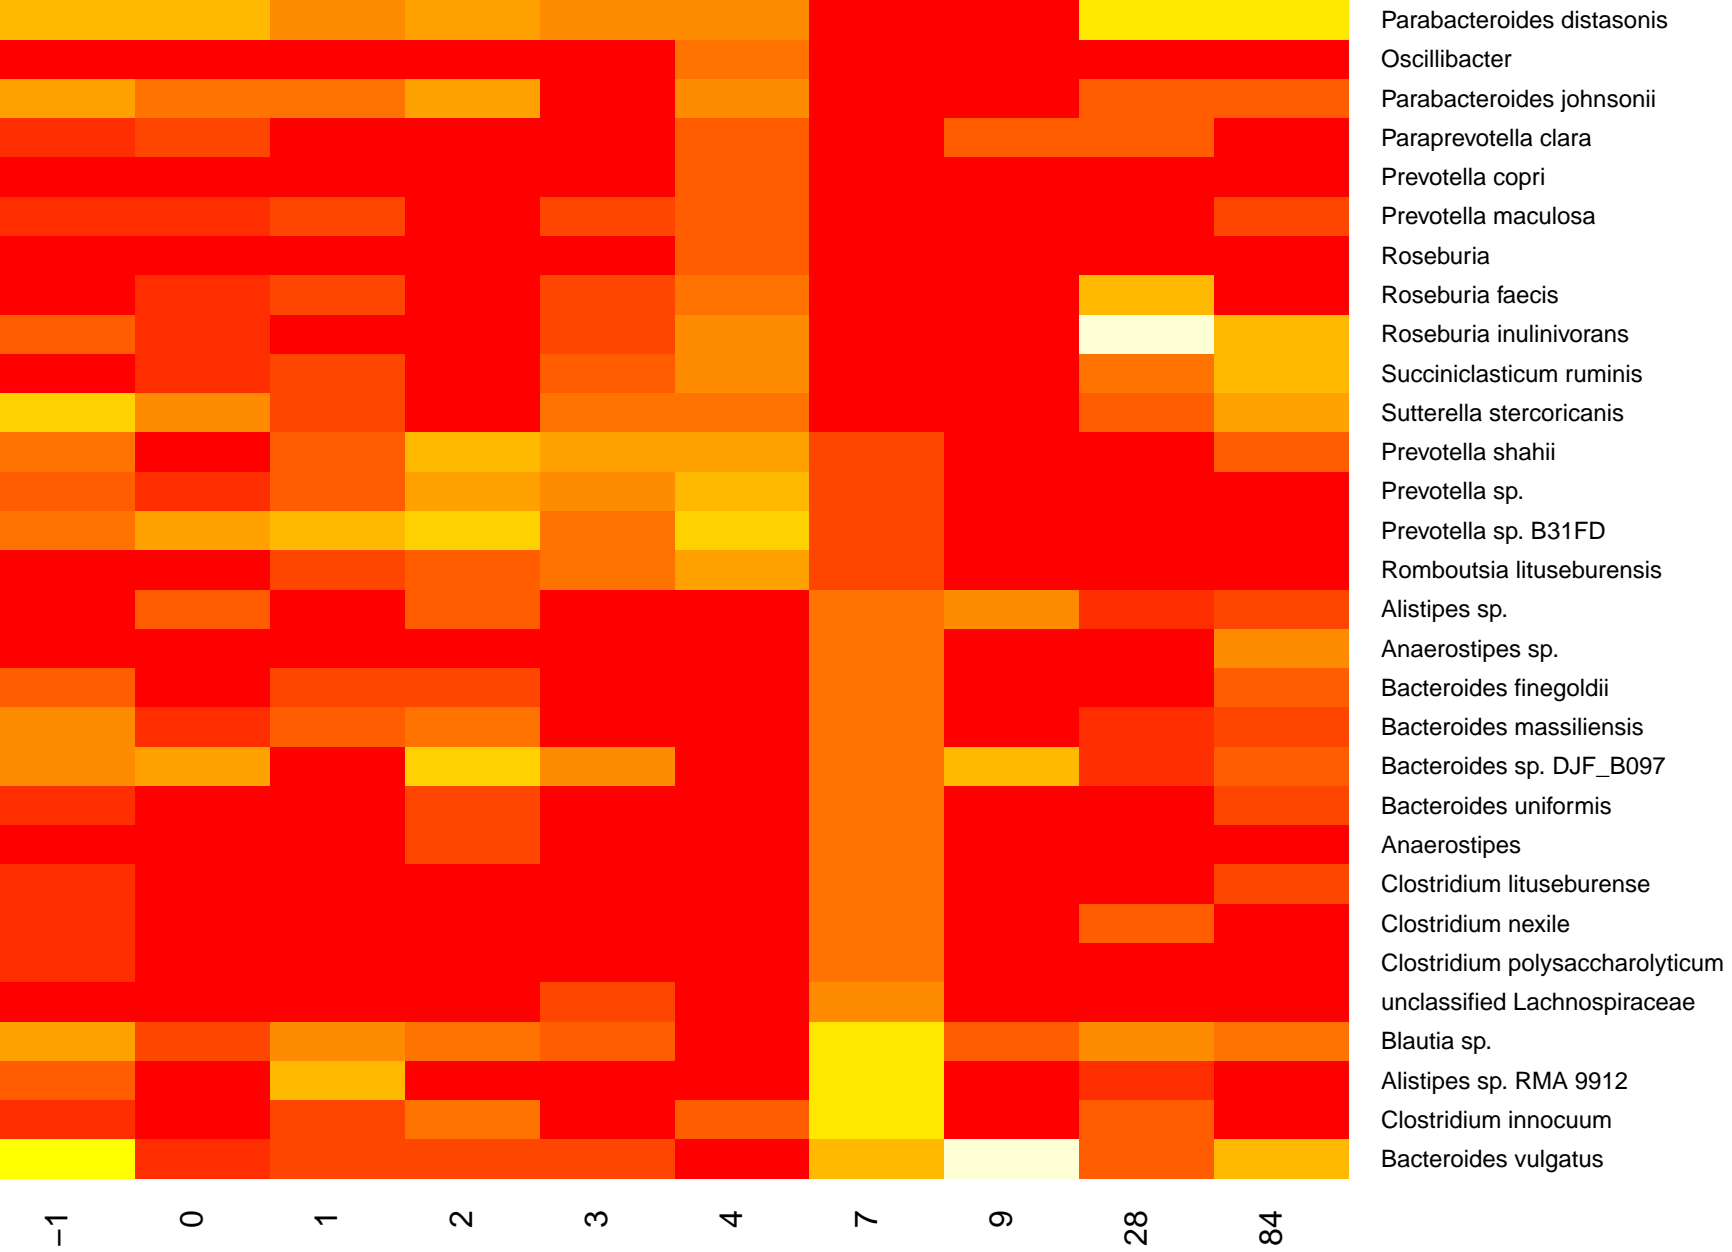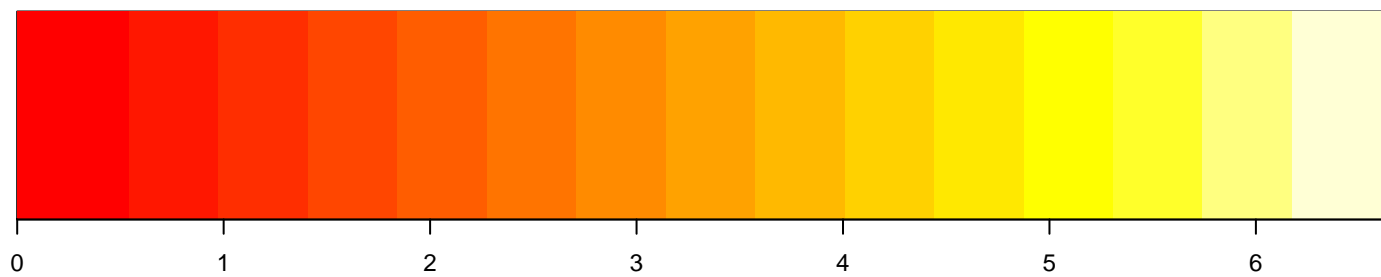

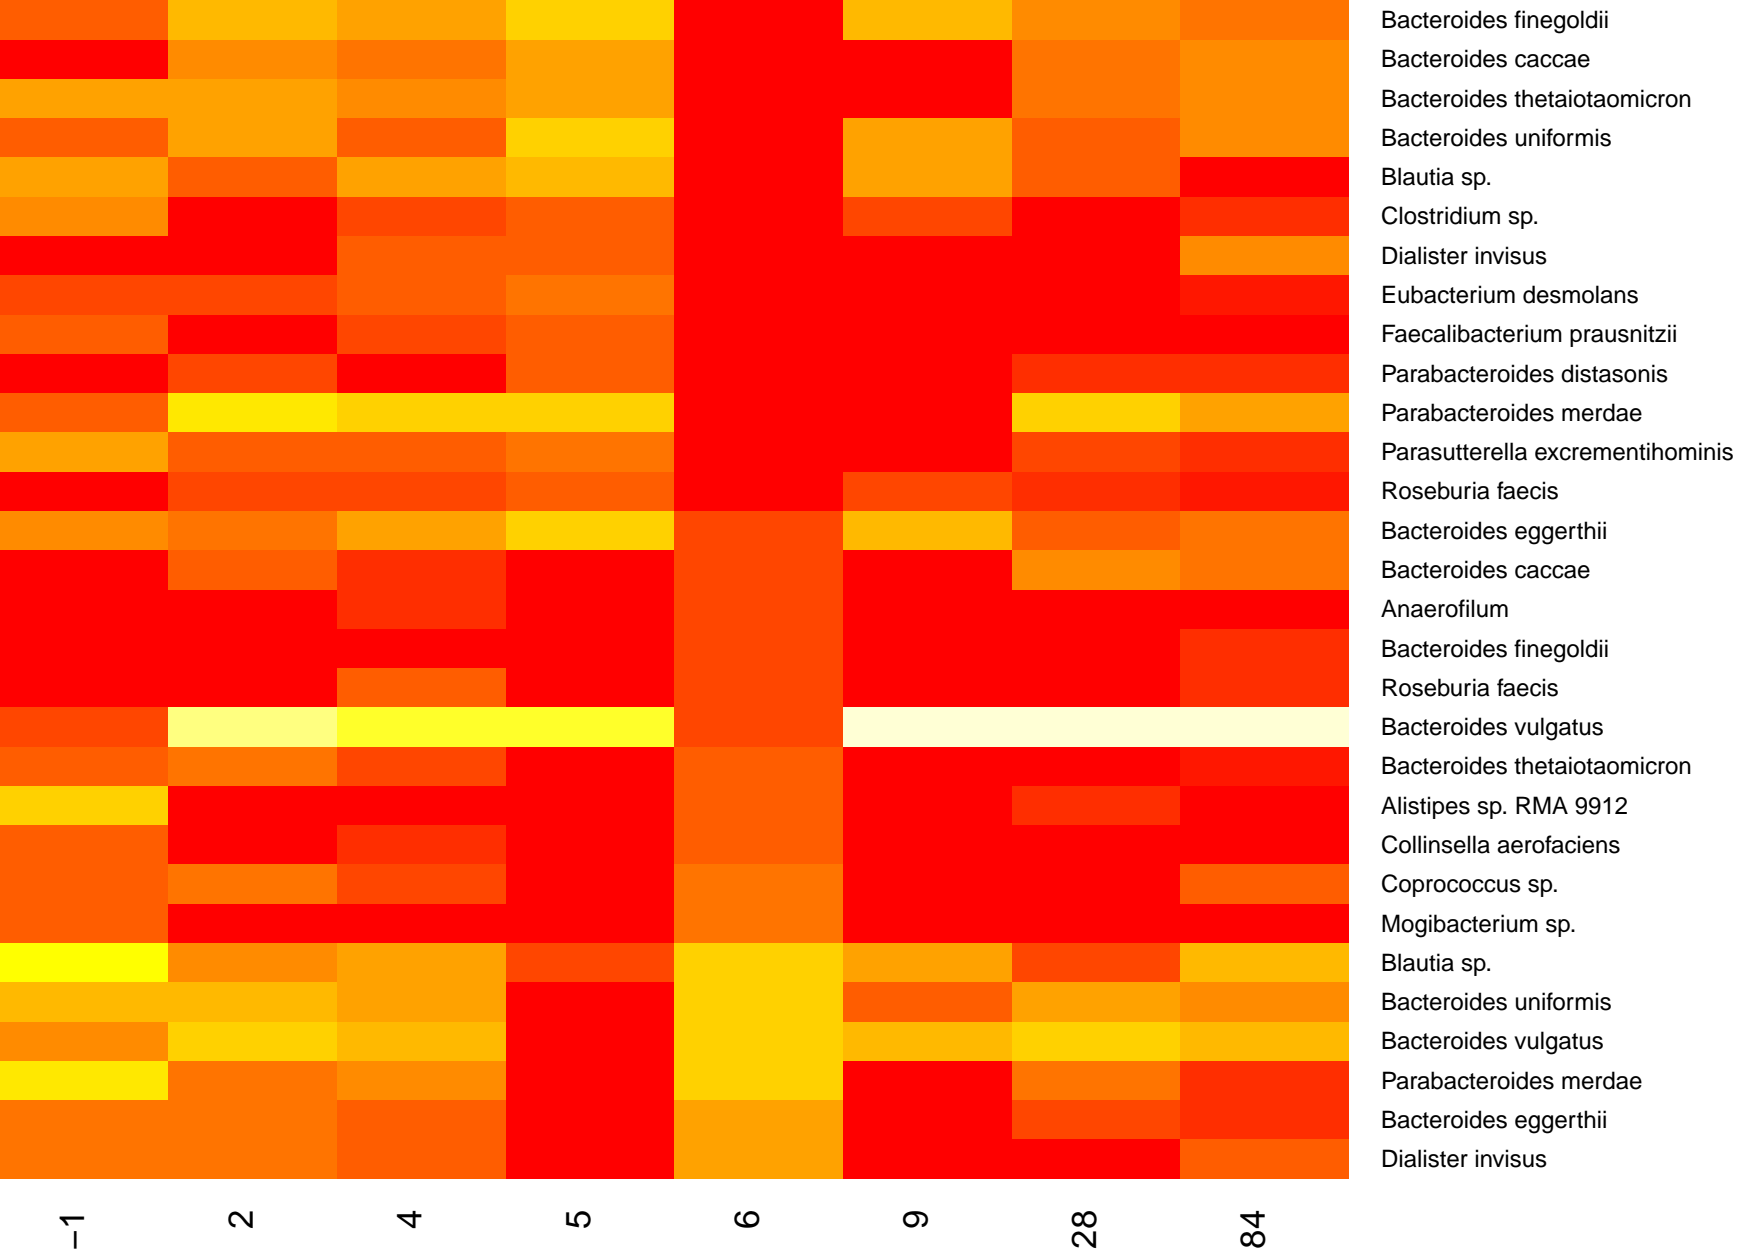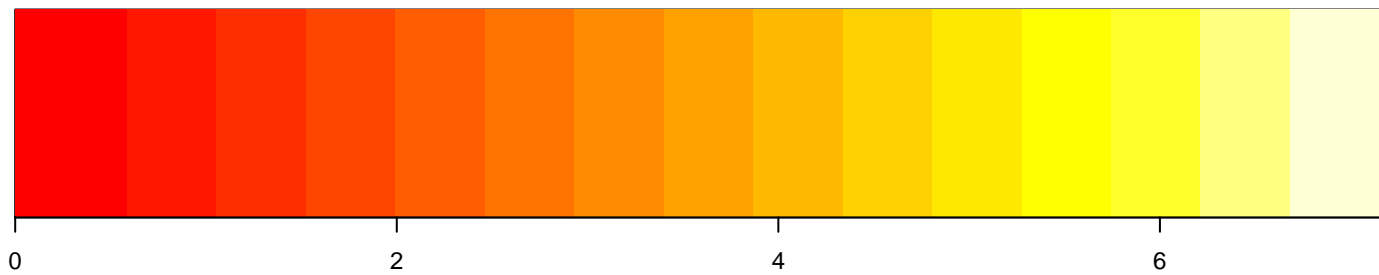

**P33**
